# Supplementary material for: Data Mining, Network Pharmacology, and Molecular Docking Explore the Effects of Core Traditional Chinese Medicine Prescriptions in Patients with Rectal Cancer and Qi and Blood Deficiency Syndrome
Source: Evid Based Complement Alternat Med. 2021 Aug 2;2021:1353674. doi: 10.1155/2021/1353674 (PMC8360715; doi:10.1155/2021/1353674)
Supplement: Supplementary Materials — S1: top 20 herbs in three core prescriptions; S2: three core prescriptions; S3: core compounds with a common rank value > 200 in the three core prescriptions; S4: most important active ingredients in core prescription relevant to the target; S5: Venn map of the top 20 Reactome pathways in the core prescription; S6: forty high-degree targets from enrichment analysis based on the Kyoto Encyclopedia of Genes and Genomes pathway; S7: coacting genes in three core prescriptions; S8: sixteen high-degree hub genes linked with both rectal cancer and three core prescriptions; and S9: molecular docking results of active ingredients in core prescriptions. [file 1353674.f1.zip]

Archive with 9 entries (9 files):
- 1353674.f1/S1 Top 20 herbs in three core prescriptions.docx
- 1353674.f1/S2  Three Core prescriptions.docx
- 1353674.f1/S3 Core compounds with a common rank value greater than 200 in the three core prescriptions.docx
- 1353674.f1/S4 The most important active ingredients in core prescription that are relevant to the target.docx
- 1353674.f1/S5 VENN map of the top 20 Reactome pathways in the core prescription.docx
- 1353674.f1/S6 Forty High Degree targets enrichment analysis based on KEGG pathway.docx
- 1353674.f1/S7 Co-acting genes in three core prescriptions.docx
- 1353674.f1/S8 16 high degree hub genes linked with both recta.docx
- 1353674.f1/S9 Molecular docking results of active ingredients.docx
